# Supplementary material for: diXa: a data infrastructure for chemical safety assessment
Source: PubMed Central journal article supplement (PMC4410652; doi:10.1093/bioinformatics/btu827), 2014-12-12
Supplement: supp_btu827_Supplementary_data_rev_final.pdf [file supp_btu827_Supplementary_data_rev_final.pdf]

## Supplementary data for “diXa: a Data Infrastructure for Chemical Safety Assessment”

Diana M. Hendrickx<sup>1,\*</sup>, Hugo J.W.L. Aerts<sup>2</sup>, Florian Caiment<sup>1</sup>, Dominic Clark<sup>3</sup>, Timothy M.D. Ebbels<sup>4</sup>, Chris T. Evelo<sup>5</sup>, Hans Gmuender<sup>6</sup>, Dennie G.A.J. Hebels<sup>1</sup>, Ralf Herwig<sup>7</sup>, Jürgen Hescheler<sup>8</sup>, Danyel G.J. Jennen<sup>1</sup>, Marlon J.A. Jetten<sup>1</sup>, Stathis Kanterakis<sup>3</sup>, Hector C. Keun<sup>4</sup>, Vera Matser<sup>3</sup>, John P. Overington<sup>3</sup>, Ekaterina Pilicheva<sup>3</sup>, Ugis Sarkans<sup>3</sup>, Marcelo P. Segura-Lepe<sup>4</sup>, Isaia Sotiriadou<sup>8</sup>, Timo Wittenberger<sup>6</sup>, Clemens Wittwehr<sup>9</sup>, Antonella Zanzi<sup>9</sup>, and Jos C.S. Kleinjans<sup>1</sup>

<sup>1</sup>Department of Toxicogenomics, School of Oncology and Developmental Biology (GROW), Maastricht University, 6200 MD Maastricht, The Netherlands. <sup>2</sup> Dana-Farber Cancer Institute, Brigham and Women’s Hospital, Harvard Medical School, Boston, 02215, MA, USA. <sup>3</sup>European Molecular Biology Laboratory – European Bioinformatics Institute, Wellcome Trust Genome Campus, Hinxton, Cambs, CB10 1SD, United Kingdom. <sup>4</sup> Computational and Systems Medicine, Department of Surgery and Cancer, Imperial College London, South Kensington, London SW7 2AZ, UK. <sup>5</sup> Department of Bioinformatics – BiGCaT Bioinformatics and Systems Biology Research Group, Maastricht University, 6200 MD Maastricht, The Netherlands. <sup>6</sup>Genedata AG, CH-4053 Basel, Switzerland. <sup>7</sup>Department of Vertebrate Genomics, Max Planck Institute for Molecular Genetics, 14195 Berlin, Germany. <sup>8</sup>Center of Physiology and Pathophysiology, Institute of Neurophysiology, University of Cologne, Cologne 50931, Germany. <sup>9</sup> European Commission , Joint Research Centre, Via E. Fermi 2749, 21027 Ispra VA, Italy.

**Table S1** Overview of projects participating in diXa

| Project                           | Description                                                                                                                    | Weblink                                                                                                                                                                                                                                                                                                   | Organism(s)                       | Organ(s) / tissue(s)                                                      | Measurement type                                                                              | Technology type                                                                                                                                                                |
|-----------------------------------|--------------------------------------------------------------------------------------------------------------------------------|-----------------------------------------------------------------------------------------------------------------------------------------------------------------------------------------------------------------------------------------------------------------------------------------------------------|-----------------------------------|---------------------------------------------------------------------------|-----------------------------------------------------------------------------------------------|--------------------------------------------------------------------------------------------------------------------------------------------------------------------------------|
| New Generis<br>(1 study)          | Links between exposure to environmental/food carcinogens during pregnancy and childhood cancer                                 | <a href="http://www.newgeneris.org/">http://www.newgeneris.org/</a>                                                                                                                                                                                                                                       | Homo Sapiens                      | Human PBMC                                                                | Transcription profiling                                                                       | DNA microarray (Agilent)                                                                                                                                                       |
| Carcinogenomics<br>(3 studies)    | High throughput genomics-based tests for assessing genotoxic and carcinogenic properties of chemical compounds <i>in vitro</i> | <a href="http://www.carcinogenomics.eu/">http://www.carcinogenomics.eu/</a>                                                                                                                                                                                                                               | Homo Sapiens<br>Rattus norvegicus | Cell lines: liver (human and rat), kidney (human and rat), lung (human)   | Metabolite profiling (only liver and kidney)<br>Transcription profiling (liver, kidney, lung) | NMR spectroscopy (Bruker)<br>DNA microarray (Affymetrix)                                                                                                                       |
| Envirogenomarkers<br>(2 studies)  | Role of environmental agents in human disease                                                                                  | <a href="http://www.envirogenomarkers.net/">http://www.envirogenomarkers.net/</a>                                                                                                                                                                                                                         | Homo Sapiens                      | Blood specimen                                                            | Transcription profiling                                                                       | DNA microarray (Agilent)                                                                                                                                                       |
| InnoMed – PredTox<br>(16 studies) | Pre-clinical safety evaluation of compounds                                                                                    | <a href="https://www.genedata.com/lp/innomed-predtox.html">https://www.genedata.com/lp/innomed-predtox.html</a>                                                                                                                                                                                           | Rattus norvegicus                 | Urine, liver, kidney, serum, blood, plasma                                | Transcription profiling<br>Metabolite profiling<br>Protein expression profiling               | DNA microarray (Affymetrix GeneChip)<br>Mass spectrometry (LC/MS)<br>NMR spectroscopy (1D NMR)<br>Mass spectrometry (SELDI-TOF-MS, 2D-PAGE/MALDI-TOF/MS, 2D-DIGE/MALDI-TOF-MS) |
| Esnats<br>(2 studies)             | Embryonic stem cell-based alternative novel testing strategies                                                                 | <a href="http://www.esnats.eu/">http://www.esnats.eu/</a>                                                                                                                                                                                                                                                 | Homo Sapiens                      | Embryonic stem cells, skin-derived stem cells                             | Transcription profiling                                                                       | DNA microarray (Affymetrix)                                                                                                                                                    |
| Predictomics<br>(1 study)         | Short-term <i>in vitro</i> assays for long-term toxicity                                                                       | <a href="http://www.ist-world.org/ProjectDetails.aspx?ProjectId=d62e81aa1bf442559aa3d2eea5b20c4f&amp;SourceDatabaseId=7cff9226e582440894200b751bab883f">http://www.ist-world.org/ProjectDetails.aspx?ProjectId=d62e81aa1bf442559aa3d2eea5b20c4f&amp;SourceDatabaseId=7cff9226e582440894200b751bab883f</a> | Homo Sapiens                      | Liver cell lines                                                          | Transcription profiling                                                                       | DNA microarray (Affymetrix)                                                                                                                                                    |
| Open TG-GATEs<br>(4 studies)      | Toxicity information for 150 compounds on rat <i>in vivo</i> , liver and kidney cells, and human hepatocytes                   | <a href="http://toxico.nibio.go.jp/english/index.html">http://toxico.nibio.go.jp/english/index.html</a>                                                                                                                                                                                                   | Homo Sapiens<br>Rattus norvegicus | Liver cell lines (rat and human)<br>Liver (only rat)<br>Kidney (only rat) | Transcription profiling                                                                       | DNA microarray (Affymetrix)                                                                                                                                                    |
| DrugMatrix<br>(5 studies)         | Toxicogenomic profiles for 638 different compounds                                                                             | <a href="https://ntp.niehs.nih.gov/drugmatrix/index.html">https://ntp.niehs.nih.gov/drugmatrix/index.html</a>                                                                                                                                                                                             | Rattus norvegicus                 | Kidney, liver, heart, liver cell lines, skeletal muscle tissue            | Transcription profiling                                                                       | DNA microarray (Affymetrix)                                                                                                                                                    |

**Table S2** Current external sources linked to the diXa Data Warehouse through the ChemAgora Portal.

| Database        | Weblink                                                                           | Reference                   |
|-----------------|-----------------------------------------------------------------------------------|-----------------------------|
| ChEMBL          | <a href="https://www.ebi.ac.uk/chembl/">https://www.ebi.ac.uk/chembl/</a>         | (Warr, 2009)                |
| ChEBI           | <a href="http://www.ebi.ac.uk/chebi/">http://www.ebi.ac.uk/chebi/</a>             | (Degtyarenko, et al., 2008) |
| ChemSpider      | <a href="http://www.chemspider.com/">http://www.chemspider.com/</a>               | (Pence and Williams, 2010)  |
| PubChem         | <a href="https://pubchem.ncbi.nlm.nih.gov/">https://pubchem.ncbi.nlm.nih.gov/</a> | (Wang, et al., 2009)        |
| eChemPortal     | <a href="http://www.echemportal.org">http://www.echemportal.org</a>               | (Wittwehr, 2011)            |
| ConsensusPathDB | <a href="http://cpdb.molgen.mpg.de/">http://cpdb.molgen.mpg.de/</a>               | (Kamburov, et al., 2013)    |
| CTD             | <a href="http://ctdbase.org/">http://ctdbase.org/</a>                             | (Davis, et al., 2013)       |
| DrugBank        | <a href="http://www.drugbank.ca/">http://www.drugbank.ca/</a>                     | (Law, et al., 2014)         |
| ToxNet          | <a href="http://toxnet.nlm.nih.gov/">http://toxnet.nlm.nih.gov/</a>               | (Wexler, 2001)              |
| CommonChemistry | <a href="http://www.commonchemistry.org/">http://www.commonchemistry.org/</a>     | -                           |
| AOP-Wiki        | <a href="https://aopkb.org/aopwiki/">https://aopkb.org/aopwiki/</a>               | -                           |
| CheList         | <a href="http://chelist.jrc.ec.europa.eu/">http://chelist.jrc.ec.europa.eu/</a>   | -                           |

### Uploading data

New data are added to the diXa repository in ISA-Tab format (Rocca-Serra, et al., 2010) ([isatab.sourceforge.net/tools.html](http://isatab.sourceforge.net/tools.html)). ISA-Tab is a metadata format that describes investigations, studies and assays, and ties together this information using links to the experimental data. The data catalogues used by the diXa studies are available in ArrayExpress (Rustici, et al., 2013).

The diXa ISA template can be downloaded from [bitbucket.org/kanterae/isaconfig-dixa/src](https://bitbucket.org/kanterae/isaconfig-dixa/src). The template has additional fields related to toxicology, such as 'dose' and 'treatment' and uses several ontologies (see Supplementary Table S3).

**diXa Data Warehouse**  
 A collection of European Toxicogenomics experiments with cross-links to chemical and molecular medicine databases.

**Studies** 34

**Samples** 3142

**Compounds** 463

**Analysis** 15

**Disease Data** 188

**News**

- 26.09.2014 Tools catalogue added
- 23.09.2014 Disease Data collection available
- 23.09.2014 Analysis results for DrugMatrix, ESNATS and carcinoGENOMICS loaded

**Links**

- Submit your data to the [DDW](#)
- Training Resources
- Tools Catalogue
- diXa Main Website

Fig. S1 diXa Data Warehouse homepage

diXa Home / Studies  
 34 Studies found

| ID       | Project         | Title                                                                                                                                   | Description                                                                                                                                                                                                                                                                                                                                                                                                                          |
|----------|-----------------|-----------------------------------------------------------------------------------------------------------------------------------------|--------------------------------------------------------------------------------------------------------------------------------------------------------------------------------------------------------------------------------------------------------------------------------------------------------------------------------------------------------------------------------------------------------------------------------------|
| DIXA-001 | New-Generis     | Transcriptomic fingerprints in human peripheral blood mononuclear cells indicative of genotoxic and non-genotoxic carcinogenic exposure | For evaluating genotoxic exposure in human populations a number of biomarkers has been successfully applied over the last 30 years to determine early biological effects due to exposure to carcinogens. Despite their success, these early biological effects markers provide limited mechanistic insight, and are unable to detect exposure to non-genotoxic carcinogens. Gene expression profiling forms a promising tool for the |
| DIXA-002 | CarcinoGenomics | Liver models - a successful tool for mechanism-based in vitro detection of genotoxicants                                                | Among the different in vitro liver models used in the carcinogenomics project, the human HepaRG cell line generated the most robust classifier that discriminated the GTX from the NGTX carcinogens and NC. This mode could now be taken forward to develop a novel in vitro test to detect genotoxic compounds                                                                                                                      |
| DIXA-003 | CarcinoGenomics | Kidney Models - A success Story                                                                                                         | Two renal cell-lines (human and rat) were assayed for gene changes resulting from carcinogen exposure in order to develop models for detecting carcinogens. The novel RPTEC/TERT1 cell was found to maintain excellent characteristics of the proximal tubule including transport capabilities and maintenance of a primary cilium. It also showed normal chromosomes and nuclear stability. It was therefore chosen as the          |

Fig. S2 The Study list view shows all studies matching a search query or the complete list of studies when browsing.

| ID               | Study    | Species           | Cell Type  | ChEMBL       | Archive data file |
|------------------|----------|-------------------|------------|--------------|-------------------|
| DIXAS-5038011LRA | DIXA-005 | Rattus norvegicus | hepatocyte | CHEMBL295416 | ↓                 |
| DIXAS-5038012LRA | DIXA-005 | Rattus norvegicus | hepatocyte | CHEMBL295416 | ↓                 |
| DIXAS-5038021LRA | DIXA-005 | Rattus norvegicus | hepatocyte | CHEMBL295416 | ↓                 |
| DIXAS-5038022LRA | DIXA-005 | Rattus norvegicus | hepatocyte | CHEMBL295416 | ↓                 |
| DIXAS-5038031LRA | DIXA-005 | Rattus norvegicus | hepatocyte | CHEMBL295416 | ↓                 |
| DIXAS-5038032LRA | DIXA-005 | Rattus norvegicus | hepatocyte | CHEMBL295416 | ↓                 |
| DIXAS-5038041LRA | DIXA-005 | Rattus norvegicus | hepatocyte | CHEMBL295416 | ↓                 |
| DIXAS-5038042LRA | DIXA-005 | Rattus norvegicus | hepatocyte | CHEMBL295416 | ↓                 |

**Fig. S3** The Sample list view shows all samples matching a search query or the complete list of samples when browsing.

| ID           | Image | Compound Name       | Synonyms                                                                                                     | Known Drug | Std InChI Key               | Smiles                                                           | ChemAgora Link                   | ChEMBL Link            |
|--------------|-------|---------------------|--------------------------------------------------------------------------------------------------------------|------------|-----------------------------|------------------------------------------------------------------|----------------------------------|------------------------|
| CHEMBL101    |       | PHENYLBUTAZONE      | Diphenylbutazone; SID90341773; Antadol; Butazolidin; Phenylbutazone; Pro-Bute; Equiphar; SID855958; Elmedal; | Yes        | VYMDGNCVAMGZFE-UHFFFAOYSA-N | <chem>CCCC1C(=O)N(N(C1=O)c2ccccc2)c3ccccc3</chem>                | <a href="#">ChemAgora Portal</a> | <a href="#">ChEMBL</a> |
| CHEMBL101283 |       | 4-NITROBENZOIC ACID | SID26753070; SID17389791; 4-Nitro-Benzoic Acid; 4-Nitrobenzoic Acid; SID85147167                             | No         | OTLNPYUJJOZPPA-UHFFFAOYSA-N | <chem>OC(=O)c1ccc(cc1)[N+](=O)[O-]</chem>                        | <a href="#">ChemAgora Portal</a> | <a href="#">ChEMBL</a> |
| CHEMBL1016   |       | CANDESARTAN         | Candesartan; SID50112728; CV-11974                                                                           | No         | HTQMVOVFRQIKW-UHFFFAOYSA-N  | <chem>CCOc1nc2ccc(C(=O)O)c2n1Cc3ccc(cc3)c4ccccc4c5nn[nH]5</chem> | <a href="#">ChemAgora Portal</a> | <a href="#">ChEMBL</a> |
| CHEMBL101740 |       | CIDOXEPIN           | Sinequan; Zonalon; Doxepin; Cidoxepin                                                                        | No         | ODQWQRAPPTVAG-BOPFTXTBSA-N  | <chem>CN(C)CC(C=C/11c2ccccc2Cc3ccccc13</chem>                    | <a href="#">ChemAgora Portal</a> | <a href="#">ChEMBL</a> |
| CHEMBL1024   |       | IFOSFAMIDE          | Ifex; SID11112548; SID56463644; Z-4942; SID301170; Ifosfamide; MJF-9325; Ifosamide                           | Yes        | HOMGKSMUEGBAAB-UHFFFAOYSA-N | <chem>C1CCN1(=O)OCCC1N1CC1</chem>                                | <a href="#">ChemAgora Portal</a> | <a href="#">ChEMBL</a> |

**Fig. S4** The Compound list view shows all compounds matching a search query or the complete list of compounds when browsing.

The screenshot shows the 'Analysis' section of the diXa Warehouse. It features a search bar and a list of 15 analyses. The table below summarizes the visible entries:

| ID          | Title                                                                                                                                                              | Summary                                                                                                                                                                                                                                                                                                                                                                                                                                                                                                                                                                                         |
|-------------|--------------------------------------------------------------------------------------------------------------------------------------------------------------------|-------------------------------------------------------------------------------------------------------------------------------------------------------------------------------------------------------------------------------------------------------------------------------------------------------------------------------------------------------------------------------------------------------------------------------------------------------------------------------------------------------------------------------------------------------------------------------------------------|
| AN-DIXA-001 | Project Envirogenomarkers: QC, normalization, transformation and analyses of transcriptomics data of cases and controls of breast cancer and Non-Hodgkins lymphoma | The project concerns the large-scale application of omics technologies in a population study aiming at:                                                                                                                                                                                                                                                                                                                                                                                                                                                                                         |
| AN-DIXA-002 | Project NewGeneris: QC, normalization, transformation and analyses of transcriptomics data from human peripheral blood mononuclear cells (PBMC)                    | Human peripheral blood mononuclear cells (PBMC) from healthy, non-smoking 2530 years old Norwegian volunteers (25 males and 35 females) were treated with 12 genotoxic or non-genotoxic compounds, respectively. Volunteers reported to be free of medication at the time of sampling. Cells were exposed in the presence of S9-mix for in vitro metabolic activation to a dose range of 3 concentrations and an untreated control. The platform used for gene expression profiling was Agilent 44k oligonucleotide microarrays. Exposures were competitively hybridized against the            |
| AN-DIXA-003 | Project PredTox: QC, normalization, transformation and analyses of transcriptomics data                                                                            | The main goal of the EU InnoMed PredTox Project was to assess the value of combining results from omics technologies (proteomics, transcriptomics and metabonomics) together with the results from more conventional toxicology methods for more informed decision making earlier in preclinical safety evaluation. The objective was to better understand the mechanisms of liver and kidney toxicity and to find novel biomarkers of toxicity more sensitive and predictive than traditional toxicological parameters. Towards this goal, in vivo studies were conducted in rats (male Wistar |
| AN-DIXA-004 | Project TG-GATEs Human in vitro hepatocytes: QC, normalization, transformation and analyses of transcriptomics data                                                | The Toxicogenomics Project was a 5-year collaborative project (2002-2007) by a consortium comprising the Japanese government and several pharmaceutical companies. The project produced the Toxicogenomics Project-Genomics Assisted Toxicity Evaluation system (TG-GATEs), a large-scale database of transcriptomics and pathology data potentially useful for predicting the toxicity of new chemical entities. Conventional in vivo toxicology data was collected from single dose and repeat dosing studies on rats, and gene expression measured for the liver (and kidney in some         |

Fig. S5 The Analysis list view shows all analyses matching a search query or the complete list of analyses when browsing.

The screenshot shows the 'Disease Data' section of the diXa Warehouse. It features a search bar and a list of 188 disease data entries, displaying 1 to 50. The table below summarizes the visible entries:

| ID         | Project                  | Title                                                                                                  | Description                                                                                                                                                                                                                        |
|------------|--------------------------|--------------------------------------------------------------------------------------------------------|------------------------------------------------------------------------------------------------------------------------------------------------------------------------------------------------------------------------------------|
| DIXAD-1001 | Liver disease collection | Gene Expression in Fixed Tissues and Outcome in Hepatocellular Carcinoma                               | Background: It is a challenge to identify those patients who, after undergoing potentially curative treatments for hepatocellular carcinoma, are at greatest risk of recurrence. Such high-risk patients could receive novel       |
| DIXAD-1002 | Liver disease collection | Integrative Transcriptome Analysis Reveals Common Molecular Subtypes of Human Hepatocellular Carcinoma | Hepatocellular carcinoma (HCC) is a highly heterogeneous disease, and prior attempts to develop genomic-based classification for HCC have yielded highly divergent results, indicating difficulty in identifying unified molecular |

Fig. S6 The Disease list view shows all diseases matching a search query or the complete list of diseases when browsing.

**Study Details:**

Internal ID: DIXA-001  
 Source ID: E-GEOD-24891  
 Project: New-Genes  
 Title: Transcriptional fingerprints in human peripheral blood mononuclear cells indicative of genotoxic and non-genotoxic carcinogenic exposure

**Description:**  
 For evaluating genotoxic exposure in human populations a number of biomarkers has been successfully applied over the last 30 years to determine early biological effects due to exposure to carcinogens. Despite their success, these early biological effects markers provide limited mechanistic insight, and are unable to detect exposure to non-genotoxic carcinogens. Gene expression profiling forms a promising tool for the development of new biomarkers in blood cells to overcome these limitations. The aim of our research was to identify novel genomics-based candidate markers for genotoxic and non-genotoxic carcinogenic exposure. Whole genome gene expression changes were investigated in human blood cells following in vivo exposure to a range of genotoxic and non-genotoxic carcinogenic compounds using whole genome microarrays. Sets of genes, as well as biological pathways indicative of genotoxic exposure and of non-genotoxic carcinogenic exposure were identified. Furthermore, networks were built using the genotoxic and non-genotoxic genes sets, showing the majority of the genes to be interlinked and revealing cooperative transcription factors for both classes. The identification of these potential candidate marker genes might contribute to the development of genomic based biomarkers of genotoxic exposure, and possibly even more importantly biomarkers of exposure to non-genotoxic carcinogens since presently no biomarkers are available. **Keywords:** Genome wide gene expression analysis, Transcriptional profile indicative of immunotoxic exposure For analysis of whole genome gene expression by microarray; PBMC from five independent donors per compound were exposed for 20 hours to three concentrations, i.e. the 100% and two serial ten-fold dilutions (10% and 1%), and a DMSO or PBS vehicle control. Exposed samples were always labelled with Cy3, whereas the vehicle control samples were labelled with Cy5, and were competitively hybridized on 444K Agilent microarrays.

Submission Date: 2007-01-01  
 Factor Name: COMPOUND TOX CLASS CONCENTRATION DOSE  
 Organism: HOMO sapiens  
 Tissue: HUMAN PBMC  
 Compound: 2,2',4,4'-TETRACHLOROBIPHENYL; 2,3,7,8-TETRACHLORODIBENZO-P-DIOXIN; 2-AMINO-1-METHYL-6-PHENYLMIDAZOLE-5-PYRROLE; 4-HYDROXYNINOSIN; ACRYLAMIDE; AFLATOXIN; ALCOHOL; BENZOPHENANTHRENE; IMIDAZOQUINOLINE; MALONALDEHYDE; N-NITROSODIMETHYLAMINE  
 Measurement Type: Transcription profiling  
 Technology Type: DNA microarray  
 Technology Platform: Agilent  
 Link to Sample Information: [click](#)  
 Link to Data Files: [click](#)  
 Link to ArrayExpress: [click](#)

**Analysis with this Study:**

| id          | Title                                                                                                                                         |
|-------------|-----------------------------------------------------------------------------------------------------------------------------------------------|
| AN-DIXA-002 | Project NewGenes: QC, normalization, transformation and analyses of transcriptomics data from human peripheral blood mononuclear cells (PBMC) |

**Fig. S7** The Study detail view shows additional information on a selected study. Furthermore, the study detail view provides links to the repositories where the experimental data are stored and links to detailed information on the compounds in the study.

**Sample Details:**

Sample ID: 5036011LRA  
 Study: DIXA-005  
 Species: Rattus norvegicus  
 Cell Type: hepatocyte  
 Sex: male  
 ChEMBL: CHEMBL295416  
 Treatment: Control  
 Dose: 0  
 Concentration Unit: micromolar  
 Archive data file: [click](#)

© European Bioinformatics Institute 2013

**Fig. S8** The Sample detail view shows additional information on a selected sample. Furthermore, the sample detail view provides links to ChEMBL and to the data file for the selected sample.



**Compound Details:**

ChEMBL ID: CHEMBL101

Compound Name: PHENYLBUTAZONE

Synonyms: Diphenylbutazone, SID90341773, Butazolidin, Phenylbutazone, Antadol, Pro-Bute, Equiphar, SID855958, Elmédal, SID85231197, Butaject, Azolid

Known Drug: Yes

Smiles: CCCCC1C(=O)N(N(C1=O)c2ccccc2)c3ccccc3

Standard InChI Key: VYMDGNCVAMGZFE-UHFFFAOYSA-N

Link to ChemAgora Portal: [click](#)

Image:

Link to ChEMBL: [click](#)

**Studies with this Compound:**

| Id                       | Project     | Title                                 |
|--------------------------|-------------|---------------------------------------|
| <a href="#">DIXA-005</a> | TG-GATES    | Open TG-GATES (in vitro rat)          |
| <a href="#">DIXA-006</a> | TG-GATES    | Open TG-GATES (in vitro, human)       |
| <a href="#">DIXA-007</a> | TG-GATES    | Open TG-GATES (in vivo single dose)   |
| <a href="#">DIXA-008</a> | TG-GATES    | Open TG-GATES (in vivo repeat dosing) |
| <a href="#">DIXA-030</a> | Drug matrix | Rat toxicological microarrays kidney  |

**Fig. S9** The Compound detail view shows additional information on a selected compound. Moreover, the compound detail view links to ChemAgora Portal, ChEMBL and studies with the selected compound.

**Analysis Details:**

Title: Project NewGeneris: QC, normalization, transformation and analyses of transcriptomics data from human peripheral blood mononuclear cells (PBMC)

Summary: Human peripheral blood mononuclear cells (PBMC) from healthy, non-smoking 20-30 years old Norwegian volunteers (25 males and 35 females) were treated with 12 genotoxic or non-genotoxic compounds, respectively. Volunteers reported to be free of medication at the time of sampling. Cells were exposed in the presence of 50-ns for in vitro metabolic activation to a dose range of 3 concentrations and an untreated control. The platform used for gene expression profiling was Agilent 44 oligonucleotide microarray. Exposures were competitive) replicates against the control for each donor. Initially, 2 doses of the 12 chemicals were analyzed but since proliferation data showed for some compounds very high cytotoxicity, exposures with lower concentration were included and the high concentrations were omitted.

Attachments:

1. Probes annotations AgilentList.txt
2. log2 signals median normalized filtered.txt
3. Data overview figures NewGeneris.pdf
4. log2 ratios.txt
5. BH q-values.txt
6. Exp annotations.txt
7. log2 signals median normalized not filtered.txt
8. average log2 ratios.txt

Study: [DIXA-001](#)

**Studies in this Analysis:**

| Id                       | Project     | Title                                                                                                                                   |
|--------------------------|-------------|-----------------------------------------------------------------------------------------------------------------------------------------|
| <a href="#">DIXA-001</a> | New-Generis | Transcriptomic fingerprints in human peripheral blood mononuclear cells indicative of genotoxic and non-genotoxic carcinogenic exposure |

© European Bioinformatics Institute 2013

**Fig. S10** The Analysis detail view shows additional information on a selected analysis. Furthermore, the analysis detail view provides access to the files containing the results and studies related to a selected analysis.



| Disease Data Details:        |                                                                                                                                                                                                                                                                                                                                                                                                                                                                                                                                                                                                                                                                                                                                                                                                                                                                                                                                                                                                                                                                                                                                                                                                                                                                                                                                                                                                                                                                                                                                                                                                                                                                                                                                                                                                                                                                                                                                                                                                                                                                                                                                                                                                                                                                                                                                                                                                                                                                                                                                                                                                           |
|------------------------------|-----------------------------------------------------------------------------------------------------------------------------------------------------------------------------------------------------------------------------------------------------------------------------------------------------------------------------------------------------------------------------------------------------------------------------------------------------------------------------------------------------------------------------------------------------------------------------------------------------------------------------------------------------------------------------------------------------------------------------------------------------------------------------------------------------------------------------------------------------------------------------------------------------------------------------------------------------------------------------------------------------------------------------------------------------------------------------------------------------------------------------------------------------------------------------------------------------------------------------------------------------------------------------------------------------------------------------------------------------------------------------------------------------------------------------------------------------------------------------------------------------------------------------------------------------------------------------------------------------------------------------------------------------------------------------------------------------------------------------------------------------------------------------------------------------------------------------------------------------------------------------------------------------------------------------------------------------------------------------------------------------------------------------------------------------------------------------------------------------------------------------------------------------------------------------------------------------------------------------------------------------------------------------------------------------------------------------------------------------------------------------------------------------------------------------------------------------------------------------------------------------------------------------------------------------------------------------------------------------------|
| Internal Id :                | DIXAC-1001                                                                                                                                                                                                                                                                                                                                                                                                                                                                                                                                                                                                                                                                                                                                                                                                                                                                                                                                                                                                                                                                                                                                                                                                                                                                                                                                                                                                                                                                                                                                                                                                                                                                                                                                                                                                                                                                                                                                                                                                                                                                                                                                                                                                                                                                                                                                                                                                                                                                                                                                                                                                |
| Source Id :                  | E-GEOD-10143                                                                                                                                                                                                                                                                                                                                                                                                                                                                                                                                                                                                                                                                                                                                                                                                                                                                                                                                                                                                                                                                                                                                                                                                                                                                                                                                                                                                                                                                                                                                                                                                                                                                                                                                                                                                                                                                                                                                                                                                                                                                                                                                                                                                                                                                                                                                                                                                                                                                                                                                                                                              |
| Project :                    | Liver disease collection                                                                                                                                                                                                                                                                                                                                                                                                                                                                                                                                                                                                                                                                                                                                                                                                                                                                                                                                                                                                                                                                                                                                                                                                                                                                                                                                                                                                                                                                                                                                                                                                                                                                                                                                                                                                                                                                                                                                                                                                                                                                                                                                                                                                                                                                                                                                                                                                                                                                                                                                                                                  |
| Title :                      | Gene Expression in Fixed Tissues and Outcome in Hepatocellular Carcinoma                                                                                                                                                                                                                                                                                                                                                                                                                                                                                                                                                                                                                                                                                                                                                                                                                                                                                                                                                                                                                                                                                                                                                                                                                                                                                                                                                                                                                                                                                                                                                                                                                                                                                                                                                                                                                                                                                                                                                                                                                                                                                                                                                                                                                                                                                                                                                                                                                                                                                                                                  |
| Description :                | <p>Background: It is a challenge to identify those patients who, after undergoing potentially curative treatments for hepatocellular carcinoma, are at greatest risk of recurrence. Such high-risk patients could receive novel interventional measures. An obstacle to the development of genome-based predictors of outcome in patients with hepatocellular carcinoma has been the lack of a means to carry out genome-wide expression profiling of fixed, as opposed to frozen, tissues. Methods: We aimed to demonstrate the feasibility of gene-expression profiling of more than 6000 human genes in formalin-fixed paraffin-embedded tissues. We applied the method to tissues from 307 patients with hepatocellular carcinoma, from four series of patients, to discover and validate a gene-expression signature associated with survival. Results: The expression-profiling method for formalin-fixed, paraffin-embedded tissue was highly effective: samples from 92% of the patients yielded data of high quality, including samples that had been archived for more than 24 years. Gene-expression profiles of tumor tissue failed to yield a significant association with survival. In contrast, profiles of the surrounding nontumoral liver tissue were highly correlated with survival in a training set of 82 Japanese patients, and the signature was validated in tissues from an independent group of 225 patients from the United States and Europe (<math>p = 0.04</math>). Conclusions: We have demonstrated the feasibility of genome-wide expression profiling of formalin-fixed, paraffin-embedded tissues and have shown that a reproducible gene-expression signature correlating with survival is present in liver tissue adjacent to the tumor in patients with hepatocellular carcinoma. This SuperSeries is composed of the following subset Series: GSE10140: Gene Expression in Fixed Tissues and Outcome in Hepatocellular Carcinoma (Training Set, Liver) GSE10141: Gene Expression in Fixed Tissues and Outcome in Hepatocellular Carcinoma (Training Set, HCC) GSE10142: Gene Expression in Fixed Tissues and Outcome in Hepatocellular Carcinoma (Validation Set) Keywords: Hepatocellular carcinoma, Expression array, Illumina, Signatures, Outcome prediction Training cohort: 80 tumor and 82 non-tumor liver tissues surgically resected from patients with hepatocellular carcinoma (HCC); Validation cohort: 225 non-tumor liver tissues surgically resected from patients with HCC. Clinical data has been withheld from GEO due to privacy concerns.</p> |
| Submission Date :            | 10/01/2008                                                                                                                                                                                                                                                                                                                                                                                                                                                                                                                                                                                                                                                                                                                                                                                                                                                                                                                                                                                                                                                                                                                                                                                                                                                                                                                                                                                                                                                                                                                                                                                                                                                                                                                                                                                                                                                                                                                                                                                                                                                                                                                                                                                                                                                                                                                                                                                                                                                                                                                                                                                                |
| Factor Name :                | ETHNICITY CORRESPONDING TUMOR SAMPLE IN GSE19977 USED FOR PROGNOSTIC PREDICTION EGF LEVEL                                                                                                                                                                                                                                                                                                                                                                                                                                                                                                                                                                                                                                                                                                                                                                                                                                                                                                                                                                                                                                                                                                                                                                                                                                                                                                                                                                                                                                                                                                                                                                                                                                                                                                                                                                                                                                                                                                                                                                                                                                                                                                                                                                                                                                                                                                                                                                                                                                                                                                                 |
| Organism :                   | Homo sapiens                                                                                                                                                                                                                                                                                                                                                                                                                                                                                                                                                                                                                                                                                                                                                                                                                                                                                                                                                                                                                                                                                                                                                                                                                                                                                                                                                                                                                                                                                                                                                                                                                                                                                                                                                                                                                                                                                                                                                                                                                                                                                                                                                                                                                                                                                                                                                                                                                                                                                                                                                                                              |
| ICD10 accession :            | C22.0 B18.1 B18.2 K70.9                                                                                                                                                                                                                                                                                                                                                                                                                                                                                                                                                                                                                                                                                                                                                                                                                                                                                                                                                                                                                                                                                                                                                                                                                                                                                                                                                                                                                                                                                                                                                                                                                                                                                                                                                                                                                                                                                                                                                                                                                                                                                                                                                                                                                                                                                                                                                                                                                                                                                                                                                                                   |
| Disease name :               | Liver cell carcinoma Chronic viral hepatitis B without delta-agent Chronic viral hepatitis C Alcoholic liver disease, unspecified                                                                                                                                                                                                                                                                                                                                                                                                                                                                                                                                                                                                                                                                                                                                                                                                                                                                                                                                                                                                                                                                                                                                                                                                                                                                                                                                                                                                                                                                                                                                                                                                                                                                                                                                                                                                                                                                                                                                                                                                                                                                                                                                                                                                                                                                                                                                                                                                                                                                         |
| Origin :                     | In vivo                                                                                                                                                                                                                                                                                                                                                                                                                                                                                                                                                                                                                                                                                                                                                                                                                                                                                                                                                                                                                                                                                                                                                                                                                                                                                                                                                                                                                                                                                                                                                                                                                                                                                                                                                                                                                                                                                                                                                                                                                                                                                                                                                                                                                                                                                                                                                                                                                                                                                                                                                                                                   |
| Assay type :                 | mRNA                                                                                                                                                                                                                                                                                                                                                                                                                                                                                                                                                                                                                                                                                                                                                                                                                                                                                                                                                                                                                                                                                                                                                                                                                                                                                                                                                                                                                                                                                                                                                                                                                                                                                                                                                                                                                                                                                                                                                                                                                                                                                                                                                                                                                                                                                                                                                                                                                                                                                                                                                                                                      |
| Measurement Type :           | transcription profiling                                                                                                                                                                                                                                                                                                                                                                                                                                                                                                                                                                                                                                                                                                                                                                                                                                                                                                                                                                                                                                                                                                                                                                                                                                                                                                                                                                                                                                                                                                                                                                                                                                                                                                                                                                                                                                                                                                                                                                                                                                                                                                                                                                                                                                                                                                                                                                                                                                                                                                                                                                                   |
| Technology Type :            | array                                                                                                                                                                                                                                                                                                                                                                                                                                                                                                                                                                                                                                                                                                                                                                                                                                                                                                                                                                                                                                                                                                                                                                                                                                                                                                                                                                                                                                                                                                                                                                                                                                                                                                                                                                                                                                                                                                                                                                                                                                                                                                                                                                                                                                                                                                                                                                                                                                                                                                                                                                                                     |
| Link to Sample Information : | <a href="#">click</a>                                                                                                                                                                                                                                                                                                                                                                                                                                                                                                                                                                                                                                                                                                                                                                                                                                                                                                                                                                                                                                                                                                                                                                                                                                                                                                                                                                                                                                                                                                                                                                                                                                                                                                                                                                                                                                                                                                                                                                                                                                                                                                                                                                                                                                                                                                                                                                                                                                                                                                                                                                                     |
| Link to Data Files :         | <a href="#">click</a>                                                                                                                                                                                                                                                                                                                                                                                                                                                                                                                                                                                                                                                                                                                                                                                                                                                                                                                                                                                                                                                                                                                                                                                                                                                                                                                                                                                                                                                                                                                                                                                                                                                                                                                                                                                                                                                                                                                                                                                                                                                                                                                                                                                                                                                                                                                                                                                                                                                                                                                                                                                     |
| Link to ArrayExpress :       | <a href="#">click</a>                                                                                                                                                                                                                                                                                                                                                                                                                                                                                                                                                                                                                                                                                                                                                                                                                                                                                                                                                                                                                                                                                                                                                                                                                                                                                                                                                                                                                                                                                                                                                                                                                                                                                                                                                                                                                                                                                                                                                                                                                                                                                                                                                                                                                                                                                                                                                                                                                                                                                                                                                                                     |

**Fig. S11** The Disease detail view shows additional information on a selected disease. Furthermore, the disease detail view provides links to the repositories where the experimental data are stored.

**Table S3** Overview of ontologies used by diXa ISA template.

| Ontology                                         | Weblink                                                                                                                   |
|--------------------------------------------------|---------------------------------------------------------------------------------------------------------------------------|
| NCBI Organismal Classification (NCBITAXON)       | <a href="http://bioportal.bioontology.org/ontologies/NCBITAXON">http://bioportal.bioontology.org/ontologies/NCBITAXON</a> |
| Units of Measurements Ontology (UO)              | <a href="http://bioportal.bioontology.org/ontologies/UO">http://bioportal.bioontology.org/ontologies/UO</a>               |
| Ontology for Biomedical Investigations (OBI)     | <a href="http://bioportal.bioontology.org/ontologies/OBI">http://bioportal.bioontology.org/ontologies/OBI</a>             |
| Chemical Entities of Biological Interest (ChEBI) | <a href="http://bioportal.bioontology.org/ontologies/CHEBI">http://bioportal.bioontology.org/ontologies/CHEBI</a>         |
| NCI Thesaurus (NCIT)                             | <a href="http://bioportal.bioontology.org/ontologies/NCIT">http://bioportal.bioontology.org/ontologies/NCIT</a>           |

**Table S4** Overview of currently available analysis descriptions, together with their location on the diXa website.

| Analysis description                                                                                                                                                        | Weblink                                                                                                           |
|-----------------------------------------------------------------------------------------------------------------------------------------------------------------------------|-------------------------------------------------------------------------------------------------------------------|
| Project Envirogenomarkers: QC, normalization, transformation and analyses of transcriptomics data of cases and controls of breast cancer and Non-Hodgkins lymphoma          | <a href="http://wwwdev.ebi.ac.uk/fg/dixa/group/AN-DIXA-001">http://wwwdev.ebi.ac.uk/fg/dixa/group/AN-DIXA-001</a> |
| Project NewGeneris: QC, normalization, transformation and analyses of transcriptomics data from human peripheral blood mononuclear cells (PBMC)                             | <a href="http://wwwdev.ebi.ac.uk/fg/dixa/group/AN-DIXA-002">http://wwwdev.ebi.ac.uk/fg/dixa/group/AN-DIXA-002</a> |
| Project PredTox: QC, normalization, transformation and analyses of transcriptomics data                                                                                     | <a href="http://wwwdev.ebi.ac.uk/fg/dixa/group/AN-DIXA-003">http://wwwdev.ebi.ac.uk/fg/dixa/group/AN-DIXA-003</a> |
| Project TG-GATEs Human in vitro hepatocytes: QC, normalization, transformation and analyses of transcriptomics data                                                         | <a href="http://wwwdev.ebi.ac.uk/fg/dixa/group/AN-DIXA-004">http://wwwdev.ebi.ac.uk/fg/dixa/group/AN-DIXA-004</a> |
| Project TG-GATEs Rat in vitro hepatocytes: QC, normalization, transformation and analyses of transcriptomics data                                                           | <a href="http://wwwdev.ebi.ac.uk/fg/dixa/group/AN-DIXA-005">http://wwwdev.ebi.ac.uk/fg/dixa/group/AN-DIXA-005</a> |
| Project TG-GATEs Rat in vivo Kidney: QC, normalization, transformation and analyses of transcriptomics data                                                                 | <a href="http://wwwdev.ebi.ac.uk/fg/dixa/group/AN-DIXA-006">http://wwwdev.ebi.ac.uk/fg/dixa/group/AN-DIXA-006</a> |
| Project TG-GATEs Rat in vivo Liver: QC, normalization, transformation and analyses of transcriptomics data                                                                  | <a href="http://wwwdev.ebi.ac.uk/fg/dixa/group/AN-DIXA-007">http://wwwdev.ebi.ac.uk/fg/dixa/group/AN-DIXA-007</a> |
| Project Predictomics: QC, normalization, transformation and analyses of transcriptomics data of test substances (hepatotoxins) in human primary hepatocytes and HepG2 cells | <a href="http://wwwdev.ebi.ac.uk/fg/dixa/group/AN-DIXA-008">http://wwwdev.ebi.ac.uk/fg/dixa/group/AN-DIXA-008</a> |
| Project DrugMatrix: QC, normalization, transformation and analyses of transcriptomics data from rat kidney, heart, liver, skeletal muscle tissue, and rat hepatocytes       | <a href="http://wwwdev.ebi.ac.uk/fg/dixa/group/AN-DIXA-009">http://wwwdev.ebi.ac.uk/fg/dixa/group/AN-DIXA-009</a> |
| Project ESNATS: QC, normalization, transformation and analyses of transcriptomics data from human embryonic stem cells                                                      | <a href="http://wwwdev.ebi.ac.uk/fg/dixa/group/AN-DIXA-010">http://wwwdev.ebi.ac.uk/fg/dixa/group/AN-DIXA-010</a> |
| Project PredTox: QC, normalization, transformation and analyses of serum metabolites by LC/MS                                                                               | <a href="http://wwwdev.ebi.ac.uk/fg/dixa/group/AN-DIXA-011">http://wwwdev.ebi.ac.uk/fg/dixa/group/AN-DIXA-011</a> |
| Project carcinoGENOMICS: QC, normalization, transformation and analyses of transcriptomics data of the kidney (RPTEC/TERT1) and liver (HepaRG) cell lines                   | <a href="http://wwwdev.ebi.ac.uk/fg/dixa/group/AN-DIXA-012">http://wwwdev.ebi.ac.uk/fg/dixa/group/AN-DIXA-012</a> |
| Project carcinoGENOMICS: QC, normalization, transformation and analyses of transcriptomics data of the liver cell line HepG2                                                | <a href="http://wwwdev.ebi.ac.uk/fg/dixa/group/AN-DIXA-013">http://wwwdev.ebi.ac.uk/fg/dixa/group/AN-DIXA-013</a> |
| Project carcinoGENOMICS: QC, normalization, transformation and analyses of transcriptomics data of Human Embryonic Stem Cell Derived Hepatocyte-Like Cells (hESC DE-Hep)    | <a href="http://wwwdev.ebi.ac.uk/fg/dixa/group/AN-DIXA-014">http://wwwdev.ebi.ac.uk/fg/dixa/group/AN-DIXA-014</a> |
| Project carcinoGENOMICS: QC, normalization, transformation and analyses of transcriptomics data in a lung epithelial cell-based test system                                 | <a href="http://wwwdev.ebi.ac.uk/fg/dixa/group/AN-DIXA-015">http://wwwdev.ebi.ac.uk/fg/dixa/group/AN-DIXA-015</a> |

## References for Table S2 and the text under Table S2.

- Davis, A.P., *et al.* (2013) The Comparative Toxicogenomics Database: update 2013, *Nucleic Acids Res.*, **41**, D1104-1114.
- Degtyarenko, K., *et al.* (2008) ChEBI: a database and ontology for chemical entities of biological interest, *Nucleic Acids Res.*, **36**, D344-D350.
- Kamburov, A., *et al.* (2013) The ConsensusPathDB interaction database: 2013 update, *Nucleic Acids Res.*, **41**, D793-D800.
- Law, V., *et al.* (2014) DrugBank 4.0: shedding new light on drug metabolism, *Nucleic acids research*, **42**, D1091-1097.
- Pence, H.E. and Williams, A. (2010) ChemSpider: an online chemical information resource, *J. Chem. Educ.*, **87**, 1123-1124.
- Rocca-Serra, P., *et al.* (2010) ISA software suite: supporting standards-compliant experimental annotation and enabling curation at the community level, *Bioinformatics*, **26**, 2354-2356.
- Rustici, G., *et al.* (2013) ArrayExpress update - trends in database growth and links to data analysis tools, *Nucl. Acids Res*, **41**, D987-D990.
- Wang, Y., *et al.* (2009) PubChem: a public information system for analyzing bioactivities of small molecules, *Nucleic acids research*, **37**, W623-633.
- Warr, W. (2009) ChEMBL. An interview with John Overington, team leader, chemogenomics at the European Bioinformatics Institute Outstation of the European Molecular Biology Laboratory (EMBL-EBI), *J Comput Aid Mol Des*, **23**, 195-198.
- Wexler, P. (2001) TOXNET: an evolving web resource for toxicology and environmental health information, *Toxicology*, **157**, 3-10.
- Wittwehr, C. (2011) Neuer Zugang zu Chemikalien-Daten. eChemPortal, *Chemie in unserer Zeit*, **45**, 122-125.
